# Supplementary material for: A C9ORF72/SMCR8-containing complex regulates ULK1 and plays a dual role in autophagy
Source: PubMed Central journal article supplement — Sci Adv. 2016 Sep 2;2(9):e1601167. doi: 10.1126/sciadv.1601167 (PMC5010369; doi:10.1126/sciadv.1601167), 2016-09-02
Supplement: 1601167_SM.pdf [file 1601167_SM.pdf]

## Supplementary Materials for

### **A C9ORF72/SMCR8-containing complex regulates ULK1 and plays a dual role in autophagy**

Mei Yang, Chen Liang, Kunchithapadam Swaminathan, Stephanie Herrlinger, Fan Lai, Ramin Shiekhatter, Jian-Fu Chen

Published 2 September 2016, *Sci. Adv.* **2**, e1601167 (2016)  
DOI: 10.1126/sciadv.1601167

#### **This PDF file includes:**

- fig. S1. Isolation of SMCR8-associated proteins.
- fig. S2. Identifying C9orf72- or SMCR8-associated Rab GTPases.
- fig. S3. Characterization of *SMCR8* and *C9orf72* shRNA constructs.
- table S1. Polypeptide composition through Flag-C9ORF72 immunopurification by mass spectrometry.

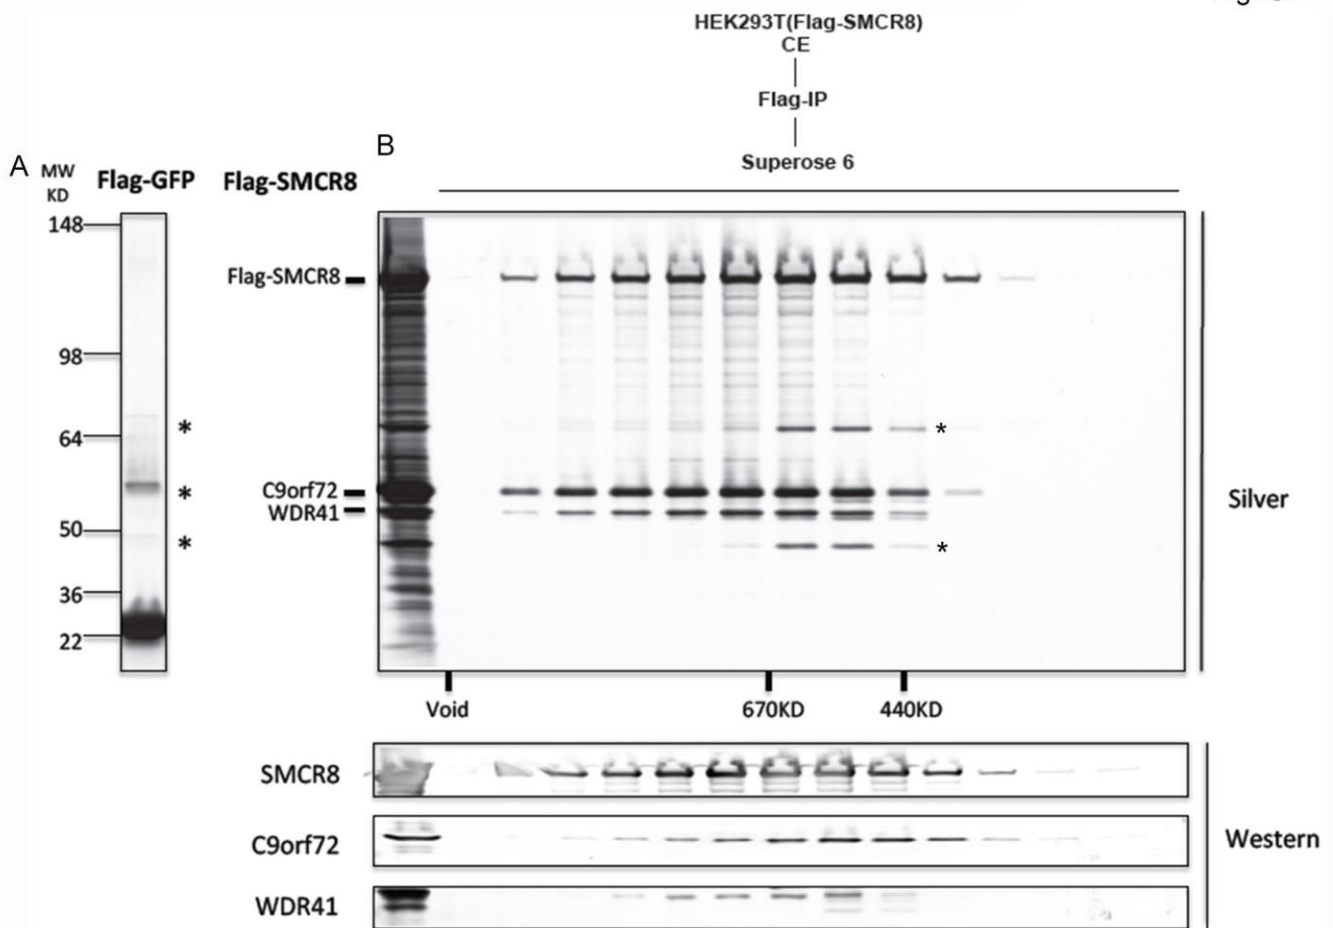

**fig. S1. Isolation of SMCR8-associated proteins.** (A and B) Silver staining analysis of Flag affinity purified fractions from cytoplasmic extracts of Flag-GFP and Flag-SMCR8 HEK293 cell lines. Asterisks indicate common contaminants of Flag purification (SKB1,  $\alpha$ -tubulin and MEP50). Flag-SMCR8 associated proteins as identified by mass spectrometry are indicated. (B) Superose 6 gel filtration fractions from SMCR8 cytoplasmic flag affinity purification. Fractions were resolved by 4-12% SDS-PAGE and analyzed by silver staining (Top) and western blot with corresponding antibodies (Bottom).

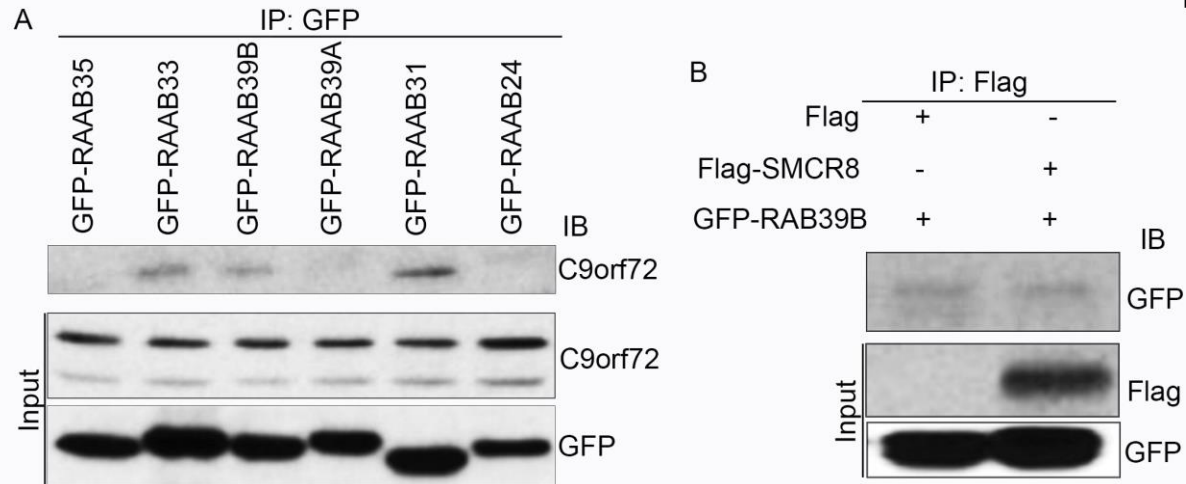

**fig. S2. Identify C9orf72- or SMCR8-associated Rab GTPases.** (A) Individual GFP-tagged Rab GTPase constructs were transfected into N2A cells. GTPase proteins were immunoprecipitated (IP) with GFP beads followed by western blot analyses using antibodies against C9orf72. (B) Flag-tagged *SMCR8* and GFP-tagged *RAB39B* were transfected into N2A cells. *SMCR8* proteins were immunoprecipitated (IP) with m2 beads (anti-Flag) followed by western blot analyses using antibodies against GFP.

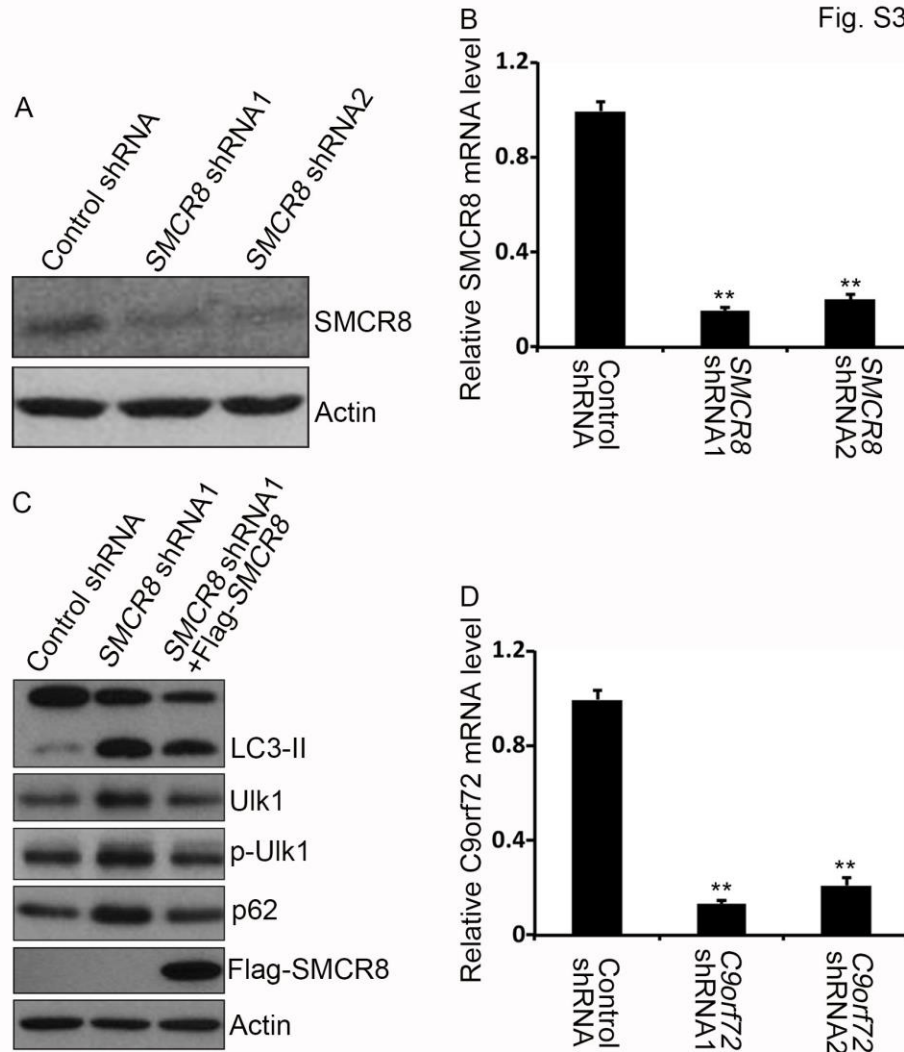

**fig. S3. Characterization of *SMCR8* and *C9orf72* shRNA constructs.** (A) Western blot analysis of *SMCR8* expression in HEK293 cells transfected with control, *SMCR8* shRNA1, or *SMCR8* shRNA2 constructs.  $\beta$ -actin serves as the loading control. (B) RT-PCR analysis of *SMCR8* mRNA in HEK293 cells transfected with control, *SMCR8* shRNA1, or *SMCR8* shRNA2 constructs. (C) HEK293 cells transfected with control, *SMCR8* shRNA1, or *SMCR8* shRNA1 plus *Flag-SMCR8* DNA followed by western blot analyses using antibodies as indicated.  $\beta$ -actin serves as the loading control. (D) RT-PCR analysis of *C9orf72* mRNA in N2A cells infected with lentiviruses expressing control, *C9orf72* shRNA1, or *C9orf72* shRNA2.

**table S1. Polypeptide composition through Flag-C9ORF72 immunopurification by mass spectrometry.**

**Supplementary Table 1**

| ID          | Description                                                               | Calculated MW | Coverage | Identified Unique Peptides |
|-------------|---------------------------------------------------------------------------|---------------|----------|----------------------------|
| UR1H_Q8TEV9 | __HOMO Smith-Magenis syndrome chromosomal region candidate gene 8 protein | 105,022       | 81.1     | 399                        |
| UR1H_Q96LT7 | __HOMO Uncharacterized protein C9orf72                                    | 54,328        | 74.6     | 259                        |
| UR1H_Q9BSB4 | __HOMO Autophagy-related protein 101                                      | 25,003        | 63.8     | 21                         |
| UR1H_Q9HAD4 | __HOMO WD repeat-containing protein 41                                    | 51,728        | 63.2     | 246                        |
| UR1H_O75385 | __HOMO Serine/threonine-protein kinase ULK1                               | 112,631       | 32.4     | 49                         |
| UR1H_E9PQZ8 | __HOMO Autophagy-related protein 13                                       | 60,155        | 26.7     | 19                         |
